# Supplementary material for: Monitoring cyanobacterial toxins in a large reservoir: relationships with water quality parameters
Source: PeerJ. 2019 Jul 16;7:e7305. doi: 10.7717/peerj.7305 (PMC6640620; doi:10.7717/peerj.7305)
Supplement: Data S1 [file peerj-07-7305-s002.xls]

## Sheet: Sheet1
Analysis of inorganic ions, algal toxins in lake water
Date	Location	Anions in mg/L					Cations in mg/L					EPA Database											Algaltoxins in µg/L
		F-	Cl-	Br-	NO3-	SO42-	Na+	NH4+	K+	Mg+	Ca+	pH	WT	Sp C	TA	TDS	TSS	Turb	True Color	Dissolved Oxygen	Total NH4	P	Anatoxin-A	MC-RR	MC-LR	MC-LA	Cylindrospermopsin	Saxitoxin
2015-09-25	1	0.163305	274.304	0	0.515053	173.13	91.7827	1.11435	7.63251	31.5112	113.836	8.1	27.3	1493	120	836	9.1	8.6	2	5.54	1.31	0.037	ND	<0.01	<0.01	ND	<0.05	<0.05
2015-11-16	2	0.152388	191.282	0	0.820133	134.647	64.6945	0.492854	4.46104	23.8711	96.3677	7.9	19.3	1386	125	738	3.3	5.3	3	7.02	0.47	0.063	ND	ND	ND	ND	0.1	<0.05
2016-01-25	3	0.149987	256.145	0	2.25289	168.158	93.1528	0.747923	7.02526	34.4582	117.083	8.1	9.4	1172	118	688	3.3	5.8	3	10.17	0.48	0.084	ND	ND	ND	ND	0.1	ND
2016-02-16	4	0.188193	239.247	0	2.05651	143.637	89.5074	0.753356	6.30301	31.9309	105.467	7.7	9.1	1165	115	659	2.5	6	1	10.7	0.59	0.052	ND	ND	ND	ND	ND	ND
2016-03-22	5	0.112217	259.325	0	1.54331	163.299	108.177	0.947189	6.99639	40.618	114.399	8.2	14.5	1698	124	930	8.8	9.7	2	9.52	0.51	0.047	ND	ND	ND	ND	ND	ND
2016-03-27	6	0.217885	664.036	0.375709	0.585456	316.971	205.109	2.06648	12.1773	68.149	118.399	8.2	14.5	1698	124	930	8.8	9.7	2	9.52	0.51	0.047	ND	ND	ND	ND	ND	ND
2016-04-20	7	0.139507	207.962	0	0	144.637	75.7527	0.814345	7.12583	33.0398	99.3562	8.2	16.2	1302	115	764	8.8	7.7	3	8.19	0.74	0.041	ND	ND	ND	ND	ND	ND
2016-04-25	8	0.120732	274.831	0.247951	1.00602	182.384	118.36	1.04398	6.97955	46.6424	137.153	8.2	16.2	1302	115	764	8.8	7.7	3	8.19	0.74	0.041	ND	ND	ND	ND	ND	ND
2016-05-23	9	0.113527	98.2444	0	0.582986	143.676	37.1023	0.650637	6.12882	36.3773	90.0323	8	18.8	1229	128	669	2.6	12.7	1	5.14	0.54	0.091	0.05	ND	ND	ND	<0.05	<0.05
2016-05-23	10	0.151515	244.681	0	0.715146	167.427	79.7129	0.801999	6.23756	34.7665	103.701	8	18.8	1229	128	669	2.6	12.7	1	5.14	0.54	0.091	0.05	ND	ND	ND	<0.05	ND
2016-05-23	11	0.138853	73.0546	0	1.07828	146.776	26.479	0.169388	4.09727	31.9192	99.4677	8	18.8	1229	128	669	2.6	12.7	1	5.14	0.54	0.091	0.09	ND	ND	ND	<0.05	ND
2016-05-23	12	0.144311	182.36	0.177348	1.01837	147.048	68.7346	0.407913	5.93779	36.6772	112.941	8	18.8	1229	128	669	2.6	12.7	1	5.14	0.54	0.091	0.03	ND	ND	ND	<0.05	ND
2016-05-23	13	0.137106	250.516	0.135323	1.80454	179.022	79.1648	0.62471	6.47334	35.8631	105.214	8	18.8	1229	128	669	2.6	12.7	1	5.14	0.54	0.091	<0.025	ND	ND	ND	ND	<0.05
2016-05-23	14	0.117675	119.768	0	0.150687	76.9571	36.817	0.513102	3.48761	15.4258	47.3016	8	18.8	1229	128	669	2.6	12.7	1	5.14	0.54	0.091	<0.025	<0.01	0.01	<0.01	ND	<0.05
2016-06-20	15	0.155227	103.176	0	0.159951	138.822	36.0938	0.227414	5.42918	34.6058	86.2103	7.8	26.7	1165	119	662	11.1	26.5	1	4.39	0.89	0.105	<0.025	<0.01	<0.01	ND	ND	<0.05
2016-06-20	16	0.12881	195.737	0	0.140806	135.831	69.5677	0.853852	6.07589	29.5167	96.093	7.8	26.7	1165	119	662	11.1	26.5	1	4.39	0.89	0.105	<0.025	<0.01	<0.01	ND	ND	ND
2016-06-20	17	0.0973714	24.4817	0	0.788019	68.2088	10.3403	0	3.86822	20.2288	66.3763	7.8	26.7	1165	119	662	11.1	26.5	1	4.39	0.89	0.105	<0.025	<0.01	<0.01	<0.01	ND	<0.05
2016-06-22	18	0.19256	238.784	0.187434	0.213679	161.404	74.7237	0.565696	7.08348	30.9655	101.313	7.8	26.7	1165	119	662	11.1	26.5	1	4.39	0.89	0.105	<0.025	<0.01	ND	0.24	ND	<0.05
2016-06-29	19	0.143219	280.91	0.175667	0.332253	154.389	86.5304	1.25238	8.65887	29.3352	91.2985	7.8	26.7	1165	119	662	11.1	26.5	1	4.39	0.89	0.105	<0.026	ND	ND	ND	0.07	<0.05
2016-06-29	20	0.192996	389.396	0.206766	0.122896	219.164	114.969	1.23436	8.35717	35.4694	108.755	7.8	26.7	1165	119	662	11.1	26.5	1	4.39	0.89	0.105	0.028	ND	0.01	ND	<0.05	<0.05
2016-06-29	21	0.185137	339.249	0.16474	0.810252	188.875	102.012	1.22893	9.90995	34.3414	109.215	7.8	26.7	1165	119	662	11.1	26.5	1	4.39	0.89	0.105	<0.025	ND	ND	ND	<0.05	<0.05
2016-07-20	22	0.177714	253.7	0.200883	0	166.208	75.3063	0.593351	7.87599	32.513	102.336	8	26.5	1024	122	286	4.3	5.7	3	2.96	0.56	0.054	0.027	ND	ND	ND	0.06	<0.05
2016-07-19	23	0.166143	269.823	0.210969	0.185889	170.12	81.947	0.99114	8.83306	32.6658	99.7757	8	26.5	1024	122	286	4.3	5.7	3	2.96	0.56	0.054	<0.025	ND	ND	ND	<0.05	<0.05
2016-07-19	24	0.18077	89.0832	0.210128	0.221708	191.875	33.682	0.308651	6.62684	46.6256	113.345	8	26.5	1024	122	286	4.3	5.7	3	2.96	0.56	0.054	<0.025	ND	ND	ND	<0.05	ND
2016-07-19	25	0.134923	155.141	0.157176	0.494673	110.416	46.4777	0.523719	5.21024	23.1393	74.675	8	26.5	1024	122	286	4.3	5.7	3	2.96	0.56	0.054	<0.025	ND	ND	ND	<0.05	ND
2016-07-19	26	0.137543	233.071	0.214331	0.104369	124.533	73.2602	0.606438	6.13796	24.2445	84.5948	8	26.5	1024	122	286	4.3	5.7	3	2.96	0.56	0.054	<0.025	ND	ND	ND	<0.05	<0.05
2016-07-20	27	0.148022	218.156	0.09834	0.213679	119.721	65.8876	0.545448	6.55418	24.5066	84.3138	8	26.5	1024	122	286	4.3	5.7	3	2.96	0.56	0.054	<0.025	ND	ND	ND	ND	ND
2016-07-20	28	0.199983	473.357	0	0	266.205	177.817	1.40671	10.5408	53.9886	162.636	8	26.5	1024	122	286	4.3	5.7	3	2.96	0.56	0.054	0.03	0.04	ND	ND	ND	ND
2016-07-20	29	0.167234	224.532	0.185753	0.0543461	114.213	71.3631	0.557054	6.17164	23.1387	80.7459	8	26.5	1024	122	286	4.3	5.7	3	2.96	0.56	0.054	<0.025	ND	ND	ND	<0.05	ND
2016-08-09	30	0.124443	194.129	0.111788	0.0524934	103.74	59.9395	0.510139	3.96687	18.0022	69.2973	8.1	27.6	1164	126	636	4.1	2.6	3	2.22	0.83	ND	<0.025	ND	ND	ND	<0.05	<0.05
2016-08-09	31	0.135578	117.625	0	0	78.0094	39.7093	0.254082	4.30466	18.159	66.6032	8.1	27.6	1164	126	636	4.1	2.6	3	2.22	0.83	ND	<0.025	0.07	ND	ND	<0.05	<0.05
2016-08-09	32	0.143001	120.729	0	0	85.4862	37.7992	0.285934	4.45527	18.5294	62.8672	8.1	27.6	1164	126	636	4.1	2.6	3	2.22	0.83	ND	ND	ND	ND	ND	0.1	<0.05
2016-08-09	33	0.15217	292.637	0.205926	0	169.176	88.364	0.543967	4.22237	28.2609	93.1168	8.1	27.6	1164	126	636	4.1	2.6	3	2.22	0.83	ND	<0.025	ND	ND	ND	0.1	<0.05
2016-08-09	34	0.133613	135.111	0.117672	0.104369	89.0381	39.8651	0.458532	4.00632	17.3096	62.7991	8.1	27.6	1164	126	636	4.1	2.6	3	2.22	0.83	ND	ND	ND	ND	ND	<0.05	<0.05
2016-08-09	35	0.135796	114.435	0.0714436	0.0858422	82.7624	34.0912	0.290626	3.59539	16.4646	65.2583	8.1	27.6	1164	126	636	4.1	2.6	3	2.22	0.83	ND	<0.025	ND	ND	ND	<0.05	<0.05
2016-08-09	36	0.120732	106.42	0.133642	0.074726	75.996	31.4978	0.132843	3.24654	15.0925	55.9014	8.1	27.6	1164	126	636	4.1	2.6	3	2.22	0.83	ND	<0.025	ND	ND	ND	0.1	<0.05
2016-08-09	37	0.145402	138.125	0.0739651	0.158098	84.272	42.0079	0.393839	3.8023	16.5024	61.622	8.1	27.6	1164	126	636	4.1	2.6	3	2.22	0.83	ND	<0.025	ND	ND	ND	<0.05	<0.05
2016-09-13	38	0.323444	225.682	0	0	196.97	245.439	0.377343	8.38988	26.4502	65.6463	8.2	27.6	1739	131	925	6.8	4.9	4	5.61	0.7	0.059	<0.025	ND	ND	ND	0.1	<0.05
2016-09-13	39	0	202.379	0	0	186.708	188.657	0.474321	7.44943	23.6515	62.4746	8.2	27.6	1739	131	925	6.8	4.9	4	5.61	0.7	0.059	<0.025	ND	ND	ND	0.1	<0.05
2010-09-13	40	0.219247	246.254	0	0	197.945	217.198	0.275461	7.89889	23.8544	63.4583	8.2	27.6	1739	131	925	6.8	4.9	4	5.61	0.7	0.059	<0.025	ND	ND	ND	<0.05	<0.05
2016-09-13	41	0.434153	292.667	0	0	231.525	230.581	0.570543	8.03907	25.392	65.6006	8.2	27.6	1739	131	925	6.8	4.9	4	5.61	0.7	0.059	<0.025	ND	ND	ND	0.1	ND
2016-09-13	42	0.332127	633.576	0	0.341547	418.755	511.823	2.1501	9.2124	38.4012	89.1454	8.2	27.6	1739	131	925	6.8	4.9	4	5.61	0.7	0.059	0.025	ND	0.01	ND	<0.05	<0.05
2016-09-13	43	0.251809	421.327	0	0	299.519	338.922	1.02902	8.61609	30.0584	70.8721	8.2	27.6	1739	131	925	6.8	4.9	4	5.61	0.7	0.059	<0.025	ND	ND	ND	0.1	<0.05
2016-09-13	44	0.256151	275.159	0	0	210.927	214.523	0.541488	7.88183	25.0831	58.8609	8.2	27.6	1739	131	925	6.8	4.9	4	5.61	0.7	0.059	0.025	ND	ND	ND	0.1	ND
2016-09-13	45	0.4233	275.714	0	0	218.918	214.617	0.500357	7.85735	25.2071	63.624	8.2	27.6	1739	131	925	6.8	4.9	4	5.61	0.7	0.059	<0.025	0.04	ND	ND	0.1	<0.05
2016-11-02	46	0.449349	332.901	0	1.24922	257.492	264.685	1.32108	8.70064	28.9901	72.2502	7.9	16.3	1440	137	881	4.2	6.2	1	10.3	0.53	0.054	0.14	ND	ND	ND	<0.05	<0.05
2017-01-11	47	0.218466	478.602	0.891862	0.775834	266.292	352.748	2.18244	8.13022	34.6478	45.0547	7.9	16.3	1440	137	881	4.2	6.2	1	10.3	0.53	0.054	ND	ND	ND	ND	ND	ND
2017-02-20	48	0.257477	371.86	1.64747	0.462199	268.362	257.614	2.9113	8.12614	33.6648	45.7408	7.9	16.3	1440	137	881	4.2	6.2	1	10.3	0.53	0.054	ND	ND	ND	ND	<0.05	<0.05
2017-03-20	49	0.241873	323.327	2.51455	0.808848	299.411	260.74	1.69345	7.37954	34.6972	47.7587	7.9	16.3	1440	137	881	4.2	6.2	1	10.3	0.53	0.054	ND	ND	ND	ND	<0.05	<0.05
2017-04-11	50	0.117035	396.921	2.22965	0.643777	196.523	217.276	0.550404	6.06056	24.0859	31.3811	7.9	16.3	1440	137	881	4.2	6.2	1	10.3	0.53	0.054	ND	ND	ND	ND	<0.05	<0.05
2017-05-05	51	0.327698	382.527	2.47739	1.03995	302.449	266.129	1.40558	7.2961	33.458	46.0655	7.8	19.2	1924	155	1200	5.8	4.7	3	7.82	0.52	0.035	ND	ND	ND	ND	<0.05	<0.05
2017-05-05	52	0.315995	412.261	2.35352	0.792341	302.449	248.847	1.69384	7.26132	31.3451	43.9224	7.8	19.2	1924	155	1200	5.8	4.7	3	7.82	0.52	0.035	ND	ND	ND	ND	<0.05	<0.05
2017-05-05	53	0.36671	346.432	2.41546	1.172	324.136	267.299	1.49684	7.75107	33.5102	49.3649	7.8	19.2	1924	155	1200	5.8	4.7	3	7.82	0.52	0.035	ND	ND	ND	ND	<0.05	<0.05
2017-05-05	54	0.261378	243.213	2.16772	0.825355	288.209	219.799	1.39857	7.0004	29.0773	41.4127	7.8	19.2	1924	155	1200	5.8	4.7	3	7.82	0.52	0.035	ND	ND	ND	ND	ND	<0.05
2017-05-05	55	0.390117	414.344	1.63508	0.850116	285.321	159.889	0.808656	6.54788	29.755	37.8321	7.8	19.2	1924	155	1200	5.8	4.7	3	7.82	0.52	0.035	ND	ND	ND	ND	0.1	<0.05
2017-05-05	56	0.36671	395.699	2.58888	1.12248	315.051	254.243	1.69625	8.53029	30.5982	41.2086	7.8	19.2	1924	155	1200	5.8	4.7	3	7.82	0.52	0.035	ND	ND	ND	ND	<0.05	<0.05
2017-05-05	57	0.370611	473.069	2.29159	0.800594	314.239	238.286	1.4066	6.15243	29.3716	41.0347	7.8	19.2	1924	155	1200	5.8	4.7	3	7.82	0.52	0.035	ND	ND	ND	ND	0.1	<0.05
2017-05-05	58	0.390117	430.753	2.51455	0.693298	325.042	275.003	4.05061	8.71211	29.622	41.7537	7.8	19.2	1924	155	1200	5.8	4.7	3	7.82	0.52	0.035	ND	ND	ND	ND	ND	ND
2017-06-08	59	0.409623	399.325	2.77468	1.0482	336.116	250.359	1.77722	8.17126	31.0978	43.5882	8.1	25.8	1737	126	943	6.7	6.6	3	5.35	1.22	0.093	ND	ND	0.04	ND	<0.05	<0.05
2017-06-08	60	0.351105	562.836	2.05624	0.718059	322.357	96.5349	1.00994	2.73281	13.0497	16.0872	8.1	25.8	1737	126	943	6.7	6.6	3	5.35	1.22	0.093	ND	ND	ND	ND	<0.05	<0.05
2017-06-08	61	0.394018	432.559	3.25777	1.3866	334.337	314.136	1.95856	7.23577	27.4891	42.0592	8.1	25.8	1737	126	943	6.7	6.6	3	5.35	1.22	0.093	ND	ND	0.06	ND	ND	ND
2017-06-08	62	0.390117	579.797	2.40307	0.957412	340.797	240.688	1.9104	8.03237	30.0501	40.8366	8.1	25.8	1737	126	943	6.7	6.6	3	5.35	1.22	0.093	ND	ND	ND	ND	<0.05	<0.05
2017-06-08	63	0.397919	777.945	3.12152	0.891383	433.207	319.695	2.80922	7.67878	32.4891	46.3818	8.1	25.8	1737	126	943	6.7	6.6	3	5.35	1.22	0.093	ND	ND	0.04	ND	<0.05	<0.05
2017-06-08	64	0.429129	102.798	4.7566	1.08121	663.871	427.947	3.52576	15.6881	37.6583	68.8825	8.1	25.8	1737	126	943	6.7	6.6	3	5.35	1.22	0.093	ND	ND	0.05	ND	<0.05	<0.05
2017-06-08	65	0.312094	456.57	0.0495479	1.16375	207.028	64.9651	0.76338	5.06936	17.7038	32.5367	8.1	25.8	1737	126	943	6.7	6.6	3	5.35	1.22	0.093	ND	ND	0.05	ND	<0.05	<0.05
2017-07-10	66	0.382315	458.675	2.50217	1.36184	383.562	245.971	2.56569	8.34411	25.5421	49.9254	7.7	26.2	1791	130	1080	3.4	2.5	3	2.56	0.86	0.039	ND	ND	ND	ND	ND	ND
2017-07-10	67	0.382315	458.671	2.45262	0.792341	397.125	247.312	1.79413	8.37917	26.4537	48.0256	7.7	26.2	1791	130	1080	3.4	2.5	3	2.56	0.86	0.039	ND	ND	ND	ND	ND	ND
2017-07-10	68	0.288687	524.024	3.36926	0.825355	444.166	279.407	1.50042	9.40734	28.5775	54.2892	7.7	26.2	1791	130	1080	3.4	2.5	3	2.56	0.86	0.039	ND	ND	ND	ND	<0.05	ND
2017-07-10	69	0.397919	473.784	3.09674	1.0482	407.38	253.994	2.05947	8.31938	26.8319	50.6496	7.7	26.2	1791	130	1080	3.4	2.5	3	2.56	0.86	0.039	ND	ND	ND	ND	ND	<0.05
2017-07-10	70	1.09623	266.834	1.27586	1.6342	191.064	188.726	1.42171	6.88462	20.1331	37.8076	7.7	26.2	1791	130	1080	3.4	2.5	3	2.56	0.86	0.039	ND	ND	ND	ND	<0.05	ND
2017-07-10	71	0.226268	382.586	1.84566	1.77451	268.166	266.663	1.84299	8.69363	25.0594	49.5801	7.7	26.2	1791	130	1080	3.4	2.5	3	2.56	0.86	0.039	ND	ND	ND	ND	<0.05	<0.05
2017-07-10	72	0.214564	413.28	2.00669	1.65896	289.637	283.469	1.16151	10.233	26.2882	55.5218	7.7	26.2	1791	130	1080	3.4	2.5	3	2.56	0.86	0.039	ND	ND	ND	ND	<0.05	<0.05
2017-07-10	73	0.13264	317.971	1.67224	1.37009	234.296	216.139	1.62588	5.91108	27.0257	40.416	7.7	26.2	1791	130	1080	3.4	2.5	3	2.56	0.86	0.039	ND	ND	ND	ND	ND	ND
2017-08-07	74	0.214564	214.661	1.04051	0.693298	219.353	147.613	1.08156	3.69004	19.8642	42.4982	7.9	26.6	1763	121	999	4	2.3	3	3.22	0.63	0.059	ND	ND	ND	ND	<0.05	<0.05
2017-08-07	75	0.124837	325.192	1.91998	1.51865	228.6	216.59	1.34573	4.23497	19.5904	43.5705	7.9	26.6	1763	121	999	4	2.3	3	3.22	0.63	0.059	ND	ND	ND	ND	<0.05	<0.05
2017-08-07	76	0.218466	412.537	0.391428	1.54341	61.9171	261.11	8.46358	5.42159	31.6435	49.5134	7.9	26.6	1763	121	999	4	2.3	3	3.22	0.63	0.059	ND	ND	ND	ND	<0.05	<0.05
2017-08-07	77	0.304291	180.549	0	0.660284	162.43	121.931	0.85814	1.39671	14.1967	33.0961	7.9	26.6	1763	121	999	4	2.3	3	3.22	0.63	0.059	ND	ND	ND	ND	<0.05	<0.05
2017-08-07	78	0.296489	223.499	0	0.973919	219.894	150.081	0.955316	2.12809	18.6674	42.7816	7.9	26.6	1763	121	999	4	2.3	3	3.22	0.63	0.059	ND	ND	ND	ND	<0.05	<0.05
2017-08-07	79	0.292588	356.271	1.61031	1.29581	284.854	232.163	1.29173	3.68624	24.7329	49.2127	7.9	26.6	1763	121	999	4	2.3	3	3.22	0.63	0.059	ND	ND	ND	ND	<0.05	<0.05
2017-08-07	80	0.323797	530.816	3.19584	1.84879	389.799	334.8	1.78	6.20923	26.5935	70.3629	7.9	26.6	1763	121	999	4	2.3	3	3.22	0.63	0.059	ND	ND	ND	ND	<0.05	<0.05
2017-08-07	81	0.273082	144.893	0.805153	0.51172	172.123	95.425	0.570041	2.44363	13.553	34.146	7.9	26.6	1763	121	999	4	2.3	3	3.22	0.63	0.059	ND	ND	ND	ND	<0.05	<0.05
2017-09-06	82	0.592978	375.288	1.69701	3.21063	309.112	240.94	1.83528	7.89648	31.6085	46.8602	7.9	26.6	1763	121	999	4	2.3	3	3.22	0.63	0.059	ND	ND	ND	ND	ND	ND
2017-09-06	83	0.195059	316.549	1.74656	0.437438	244.849	204.266	1.2703	6.82401	25.9129	33.6385	7.9	26.6	1763	121	999	4	2.3	3	3.22	0.63	0.059	ND	ND	ND	ND	<0.05	<0.05
2017-09-06	84	0.308192	419.646	2.19249	0.643777	316.269	261.428	1.81759	8.64416	31.245	40.7071	7.9	26.6	1763	121	999	4	2.3	3	3.22	0.63	0.059	ND	ND	ND	ND	<0.05	ND
2017-09-06	85	0.339402	415.254	2.16772	0.668537	338.165	255.052	1.74971	8.2123	32.7039	44.811	7.9	26.6	1763	121	999	4	2.3	3	3.22	0.63	0.059	ND	ND	ND	ND	ND	ND
2017-09-06	86	0.191157	384.877	2.24204	0.676791	238.693	230.596	1.32524	5.49171	22.7961	31.6365	7.9	26.6	1763	121	999	4	2.3	3	3.22	0.63	0.059	ND	ND	ND	ND	<0.05	<0.05
2017-09-06	87	0.358908	413.38	1.9943	0.486959	317.818	248.501	1.94819	8.77652	25.3476	40.3923	7.9	26.6	1763	121	999	4	2.3	3	3.22	0.63	0.059	ND	ND	ND	ND	<0.05	<0.05
2017-09-06	88	0.347204	417.368	2.15533	1.02344	324.569	251.102	1.91975	8.60122	25.6661	43.8291	7.9	26.6	1763	121	999	4	2.3	3	3.22	0.63	0.059	ND	ND	ND	ND	<0.05	ND
2017-09-06	89	0.230169	187.689	1.09005	0.264114	248.15	119.794	0.888065	5.51291	22.0291	36.9331	7.9	26.6	1763	121	999	4	2.3	3	3.22	0.63	0.059	ND	ND	ND	ND	ND	ND
						WT	Water Temperature, ˚ C
						Sp C	Specific Conductivity, S/m
						TA	Total Alkalinity, mg/L
						TDS	Total Dissolved Solids, mg/L
						TSS	Total suspended solids, mg/L
						Turb	Turbidity Unit, NTU
						True Color	True Color, HU
						Dissolved Oxygen	Dissolved Oxygen, mg/L
						Total NH4	Total Ammonium, mg/L
						P	Phosphorous, mg/L
